# Supplementary material
Source: publisher figshare collection journal article supplement (https://gsajournals.figshare.com/articles/dataset/_/13070288)
Supplement: Supplementary file 1 [file 1]

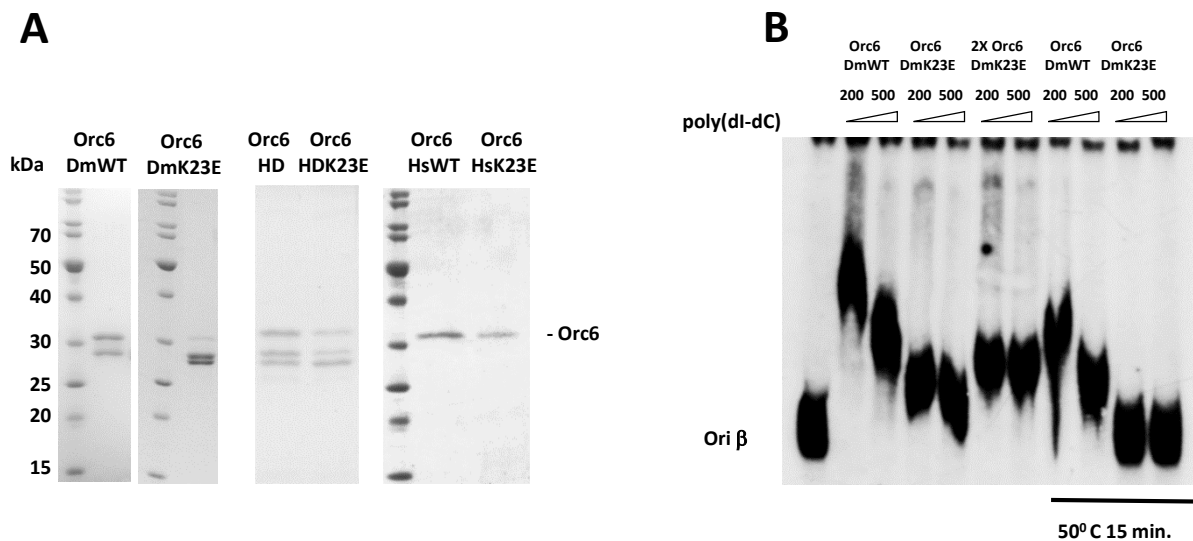

**Figure S4. (A)** Coomassie blue stained SDS gel of purified proteins used for electrophoretic mobility shift assays in Fig.6. **(B)** Electrophoretic mobility shift assay of *Drosophila* Orc6 wild type and K23E mutant, 2X Orc6-DmK23E indicates two fold increase in the amount of Orc6 protein in the reaction. '50°C 15 min.' indicates heat treatment of the protein for 15 minutes before adding to the reaction. Amount of competitor poly(dI-dC) and poly(dG-dC) is shown in nanograms.
