# Supplementary material
Source: publisher figshare collection journal article supplement (https://gsajournals.figshare.com/articles/dataset/_/13070288)
Supplement: Supplementary file 2 [file 1]

Table S1

Gene ontology annotation for Y225S mutant

| GO terms: DOWNREGULATED         | GO terms: UPREGULATED          |
|---------------------------------|--------------------------------|
| neurogenesis                    | proteolysis                    |
| mitotic nuclear division        | transmembrane transport        |
| DNA replication                 | oxidation-reduction process    |
| DNA repair                      | innate immune response         |
| transcription, DNA-templated    | response to bacterium          |
| oogenesis                       | circadian rhythm               |
| DNA replication initiation      | hexose transmembrane transport |
| cellular response to starvation | glucose import                 |
| mitotic spindle organization    | carbohydrate metabolic process |
| rRNA processing                 | response to fungus             |
| protein import into nucleus     | transport                      |
| mitotic cell cycle              | peptide catabolic process      |

Genes that are downregulated in both Y225S and K23E mutants more then 2 times

| Drosophila<br>Entrez<br>Gene ID | Human<br>Entrez<br>Gene ID(s) | Symbol     | Description                   | Maximum<br>expression | Y225S vs<br>wild-type | K23E vs<br>wild-type |
|---------------------------------|-------------------------------|------------|-------------------------------|-----------------------|-----------------------|----------------------|
| 251711                          |                               | CG31517    | no data                       | Ovary                 | -4.5                  | -1.7                 |
| 41254                           | 51548                         | Sirt6      | Histone deacetylase           | Ovary                 | -4.2                  | -1.5                 |
| 40217                           | 23028                         | Su(var)3-3 | Histone demethylase           | Ovary                 | -3.8                  | -2.0                 |
| 318225                          |                               | CG32816    | no data                       | Larval trachea        | -3.0                  | -2.0                 |
| 42183                           | 84154                         | Non3       | rRNA binding activity         | Ovary                 | -2.8                  | -1.6                 |
| 317935                          |                               | CG32243    | no data                       | Ovary                 | -2.7                  | -1.9                 |
| 41994                           |                               | CG14882    | Methionine synthase reductase | Ovary                 | -2.7                  | -1.6                 |
| 2768669                         | 55425                         | CG33332    | no data                       | Ovary                 | -2.4                  | -1.5                 |
| 42056                           | 24140                         | CG5220     | tRNA methyltransferase        | Ovary                 | -2.3                  | -1.9                 |

Genes that are upregulated in both Y225S and K23E mutants more then 2 times

| Drosophila<br>Entrez<br>Gene ID | Human<br>Entrez<br>Gene ID(s) | Symbol    | Description                       | Maximum<br>expression | Y225S vs<br>wild-type | K23E vs<br>wild-type |
|---------------------------------|-------------------------------|-----------|-----------------------------------|-----------------------|-----------------------|----------------------|
| 43248                           |                               | CG17192   | Phospholipase A(1)                | Digestive system      | 5.4                   | 11.7                 |
| 43264                           |                               | CG6074    | Carbonic anhydrase                | Adult salivary gland  | 3.8                   | 3.7                  |
| 43543                           |                               | Jon99Ciii | Serine protease                   | Digestive system      | 3.5                   | 2.2                  |
| 38240                           |                               | Cpr62Bb   | Cuticular protein                 | Adult head            | 3.4                   | 2.3                  |
| 35498                           |                               | TpnC4     | Troponin C isoform 4              | Adult carcass         | 2.9                   | 2.1                  |
| 33707                           |                               | Jon25Bii  | Serine protease                   | Digestive system      | 2.9                   | 2.6                  |
| 33708                           |                               | Jon25Bi   | Serine protease                   | Digestive system      | 2.9                   | 2.3                  |
| 33706                           |                               | Jon25Biii | Serine protease                   | Digestive system      | 2.8                   | 2.2                  |
| 42451                           |                               | CG4000    | no data                           | Adult head            | 2.7                   | 2.4                  |
| 35859                           | 57115                         | PGRP-SC1a | Peptidoglycan recognition protein | Digestive system      | 2.6                   | 5.4                  |
| 38328                           |                               | CG14949   | no data                           | Digestive system      | 2.6                   | 2.8                  |
| 34055                           |                               | CG7203    | Cuticular protein                 | Adult eye             | 2.2                   | 2.7                  |
| 38946                           |                               | CG17352   | no data                           | Adult eye             | 2.1                   | 2.0                  |
| 318098                          | 91445                         | CG32581   | Ubiquitin protein ligase          | Adult head            | 2.1                   | 48.1                 |
