# Supplementary material
Source: publisher figshare collection journal article supplement (https://gsajournals.figshare.com/articles/dataset/_/13070288)
Supplement: Supplementary file 3 [file 1]

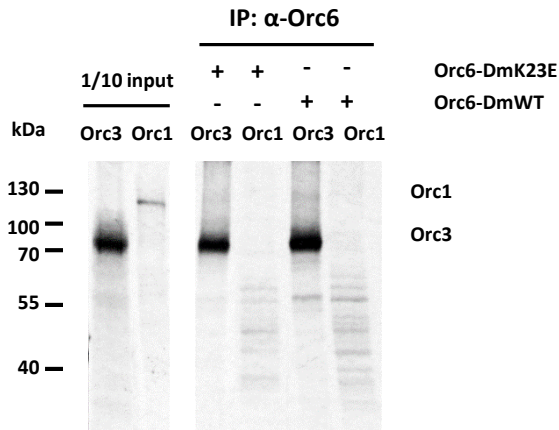

**Figure S3. K23E mutation in Orc6 does not affect its association with Orc3 subunit of the ORC complex.** Orc3 or Orc1 were synthesized in *in vitro* transcription-translation reactions (Promega). Purified recombinant *Drosophila* Orc6 wild type or K23E mutant protein was added to the reactions, and Orc6 was immunoprecipitated with anti-Orc6 antibodies. Orc3 co-immunoprecipitated with both wild type and K23E mutant *Drosophila* Orc6. Orc1 served as a negative control since it does not interact with Orc6.
