# Supplementary material
Source: publisher figshare collection journal article supplement (https://gsajournals.figshare.com/articles/dataset/_/13070288)
Supplement: Supplementary file 4 [file 1]

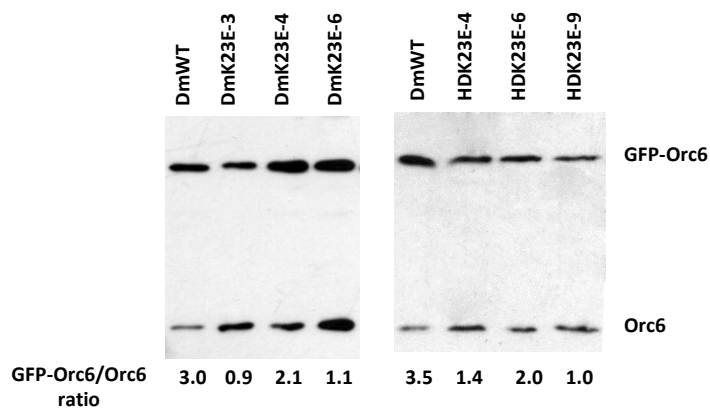

**Figure S2. Expression levels of K23E mutant Orc6 transgenes.** Ovary extracts from flies expressing mutant GFP-Orc6s were subjected to western blotting using antibody against Orc6 protein. Upper band corresponds to transgene-derived GFP-Orc6, lower band corresponds to endogenous Orc6.
