# Supplementary material
Source: publisher figshare collection journal article supplement (https://gsajournals.figshare.com/articles/dataset/_/13070288)
Supplement: Supplementary file 6 [file 1]

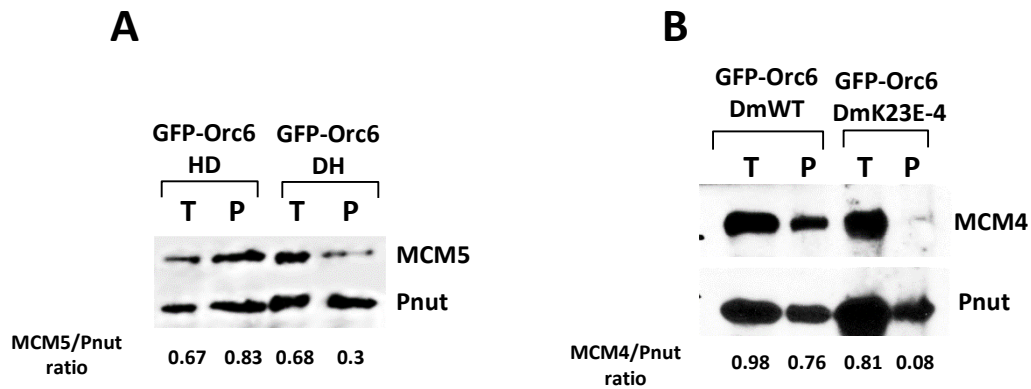

**Figure S1. MCM2–7 complex chromatin association. (A)** Chromatin association of Mcm5, a member of the MCM2–7 complex, is reduced in *orc6* deletion fly larvae expressing GFP-Orc6-DH but not GFP-Orc6-HD hybrid protein. Neural ganglia of homozygous *orc6* deletion *Drosophila* larvae expressing GFP-Orc6 transgenes under native *orc6* promoter were isolated and subjected to salt extraction to solubilize cellular proteins. Insoluble and chromatin associated proteins were pelleted by centrifugation and analyzed by Western blotting using Mcm5 polyclonal antibodies. **(B)** Chromatin association of Mcm4, a member of the MCM2–7 complex, is significantly reduced in *orc6* deletion fly larvae expressing GFP-Orc6-DmK23E mutant protein compared to the wild type GFP-Orc6-DmWT.

Pnut indicates the loading control;

P - insoluble pellet after salt extraction, T- total tissue extract.

MCM5/Pnut or MCM4/Pnut ratios are shown.
